# THE AMERICAN JOURNAL OF PSYCHIATRY

April 2008

Vol. 165, No. 4:411-548

THE AMERICAN JOURNAL OF PSYCHIATRY

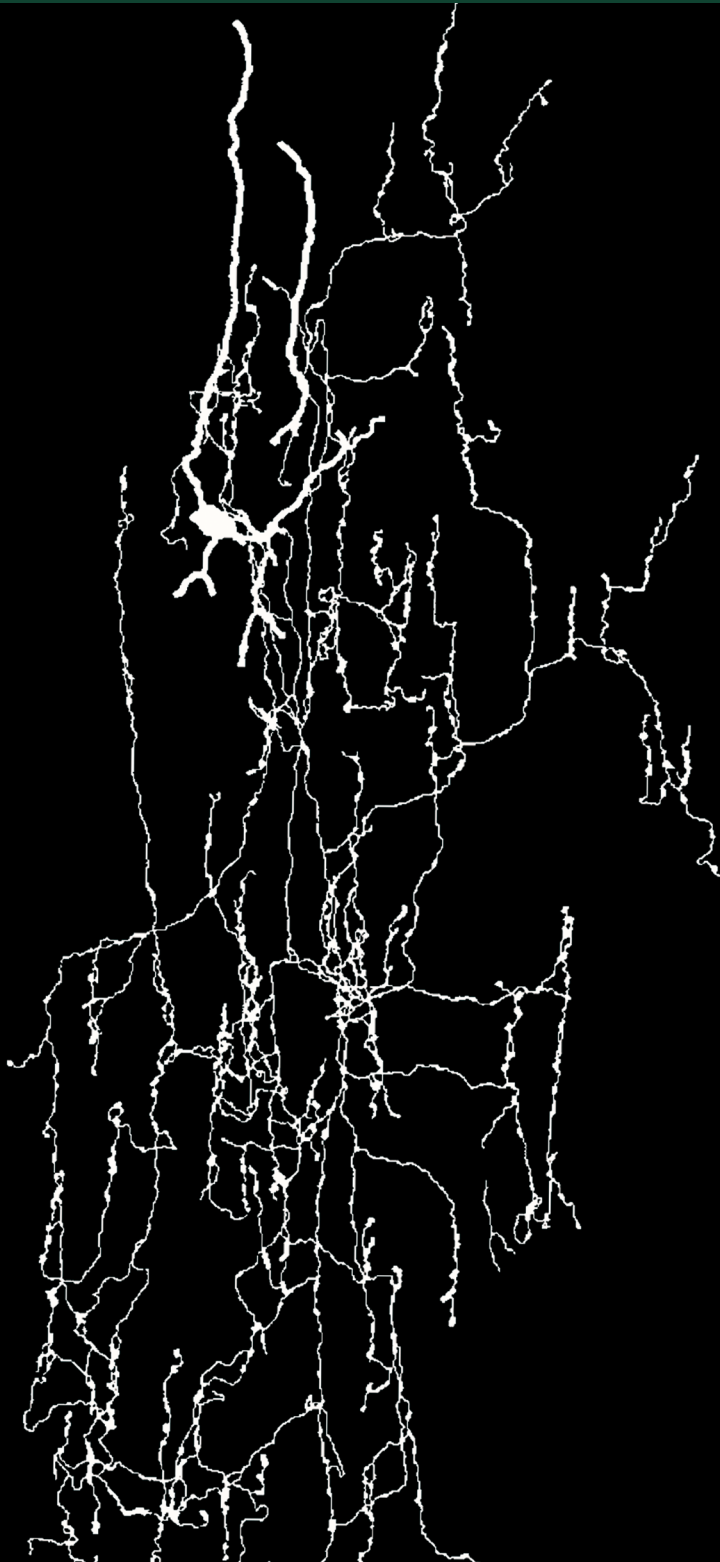

**Teaching Supportive  
Psychotherapy to  
Psychiatric Residents**

Carolyn J. Douglas

445

**Fluoxetine Versus Placebo in  
Preventing Relapse of Major  
Depression in Children and  
Adolescents**

Graham J. Emslie et al.

459

**Conserved Regional Patterns  
of GABA-Related Transcript  
Expression in the Neocortex of  
Subjects With Schizophrenia**

Takanori Hashimoto et al.

479

**Excessive Brain Volume Loss  
Over Time in Cannabis-Using  
First-Episode Schizophrenia  
Patients**

Monica Rais et al.

490

**Continuing Medical Education**

545

**April 2008**

**Volume 165 • Number 4**

Official Journal of the  
AMERICAN PSYCHIATRIC ASSOCIATION

[ajp.psychiatryonline.org](http://ajp.psychiatryonline.org)
