# THE AMERICAN JOURNAL OF PSYCHIATRY

April 2008

Vol. 165, No. 4:411-548

THE AMERICAN JOURNAL OF PSYCHIATRY

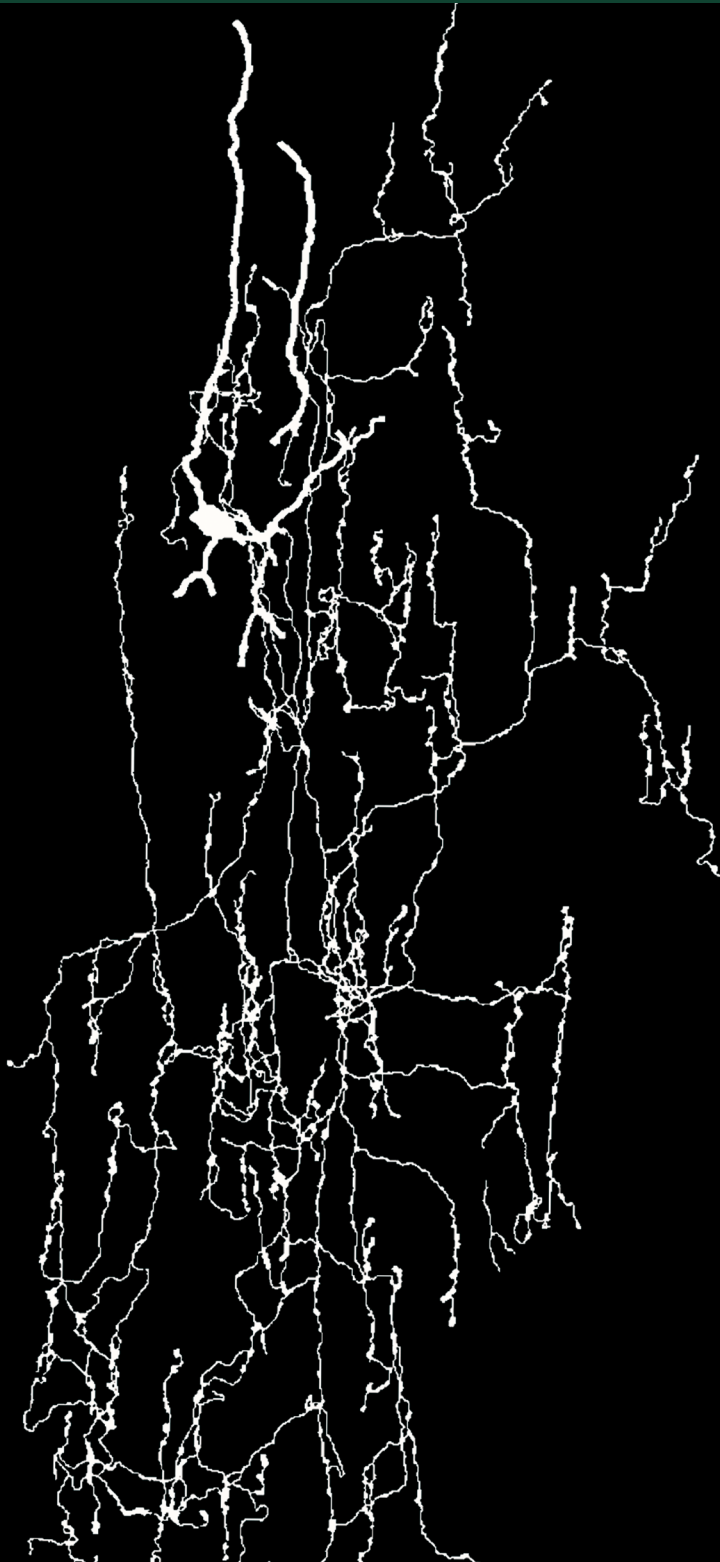

**Teaching Supportive  
Psychotherapy to  
Psychiatric Residents**  
Carolyn J. Douglas

445

**Fluoxetine Versus Placebo in  
Preventing Relapse of Major  
Depression in Children and  
Adolescents**

Graham J. Emslie et al.

459

**Conserved Regional Patterns  
of GABA-Related Transcript  
Expression in the Neocortex of  
Subjects With Schizophrenia**

Takanori Hashimoto et al.

479

**Excessive Brain Volume Loss  
Over Time in Cannabis-Using  
First-Episode Schizophrenia  
Patients**

Monica Rais et al.

490

**Continuing Medical Education**

545

**April 2008**

**Volume 165 • Number 4**

Official Journal of the  
AMERICAN PSYCHIATRIC ASSOCIATION

[ajp.psychiatryonline.org](http://ajp.psychiatryonline.org)

# Read *The American Journal of Psychiatry* Online

Activate your FREE online access—It's as easy as 1, 2, 3!

To begin activation, go to [ajp.psychiatryonline.org](http://ajp.psychiatryonline.org) and click **SUBSCRIBE**

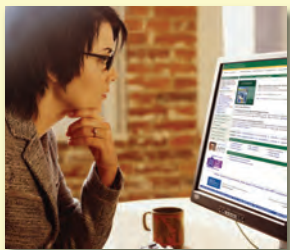

## For APA Members and Other Individuals:

1. Click on **ACTIVATE Your Member or Individual (Non-Member) Subscription**
2. Locate your 10-digit Member/Customer Number\* on your journal mailing label above your name. Be sure to enter all 10 digits, including any leading zeros.
3. Enter your number in the box and click **SUBMIT**.

On the next screen, you'll register your subscription and create a username and password that can be used immediately to access your online subscription.

\*If you are an APA Member, in most cases the number on your label will be your Member Number; if it is not, please enter your APA Member Number (with enough leading zeros to create 10 digits) instead of the number on your mailing label.

## For Institutions:

1. Click on **ACTIVATE Your Institutional Subscription**.
2. Locate your Customer Number on the journal mailing label above your name. Be sure to enter all 10-digits.
3. Enter your number in the box and click **SUBMIT**. On the next screen, you'll have the opportunity to enter IP addresses for your institution to provide seamless access for your patrons.

## Member/Customer Number

|                            |                    |
|----------------------------|--------------------|
| AJP3000056866              | CAR-RT LOT88 C-015 |
| John Q. Sample             |                    |
| Mental Health Professional |                    |
| 1000 Wilson Blvd STE 1825  |                    |
| Arlington VA 22209-3924    |                    |
|                            | 01654              |

## Benefits of Online Activation

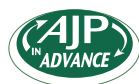

**AJP in Advance**—key research articles posted on the AJP website well in advance of their appearance in print.

**Back issue access to Volume 1, Issue 1**, starting with the *American Journal of Insanity* in 1844. (Available to institutions as a separate one-time purchase.)

**AJP CME**—interactive quizzes that offer *AMA PRA Category 1 Credits™* for selected articles from each issue (with paid subscription to the CME Course Program).

**AJP Audio**—MP3-format program summarizing findings from key articles from each issue.

**Residents' Journal**—the gateway to AJP articles and features that have most value to residents in their training.

**Precise and powerful searching** by author, keyword, and/or citation details—within any one journal, across the entire PsychiatryOnline journal collection, or across all HighWire journals.

**PubMed, CrossRef, and Google Scholar links**—from cited references to abstracts and full text; to similar articles; to other articles by the same lead authors.

**eTOCs**—Get advance email alerts with the table of contents from the latest issue.

For more information or if you cannot locate your customer number, please contact APPI Customer Service:  
Call: 1.800.368.5777 or 703.907.7322  
Email: [appi@psych.org](mailto:appi@psych.org)

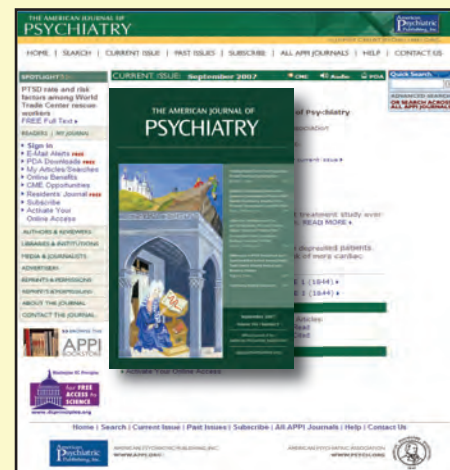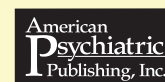

The First and Last Word in Psychiatry

AH810

## New Feature for Residents!

# The American Journal of Psychiatry Residents' Journal

A FREE electronic publication produced specifically for psychiatry residents

The Residents' Journal contains special links to full text of the articles from the current *American Journal of Psychiatry* and to AJP Audio, a downloadable MP3 file featuring highlights from the issue. In addition, this e-mail bulletin contains two exclusive features:

### Journal Club Kit

A featured article presented with an overview discussing the reasons for its selection, discussion questions, and an editorial by a senior member of the field placing the article into clinical context.

### Educational Article

Case presentation that illustrates a major point in clinical practice or highlights unique treatment approaches.

Plus lively contributions from your fellow residents:

- Instructive cases
- Unique clinical or educational programs
- Perspectives on training and career development
- Discussions arising from journal club discussions

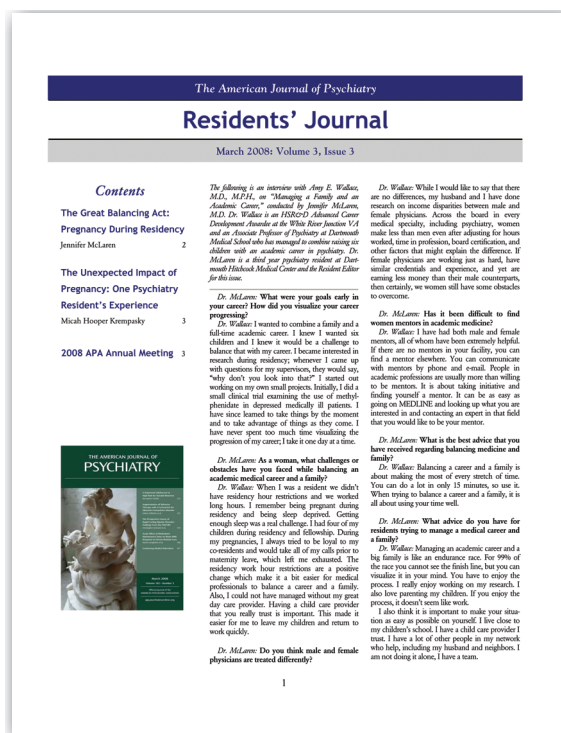

The Resident's Journal is sent free-of-charge to all psychiatry residents. Anyone interested in being included on the distribution list should contact Lisa Devine, the Residents' Journal staff editor at [ajp@psych.org](mailto:ajp@psych.org) with "Subscribe to Residents' Journal" in the subject line.

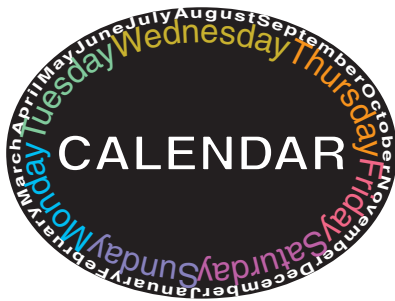

For free listing of your organization's official annual or regional meeting, please send us the following information: sponsor, location, inclusive dates, type and number of continuing education credits (if available), and the name, address, and telephone number of the person or group to contact for more information. In order for an event to appear in our listing, all notices and changes must be received at least 6 months in advance of the meeting and should be addressed to:

Calendar, American Journal of Psychiatry, 1000 Wilson Boulevard, Suite 1825, Arlington, VA 22209-3901, [jblair@psych.org](mailto:jblair@psych.org) (e-mail).

Because of space limitations, only listings of meetings of the greatest interest to Journal readers will be included.

---

## APRIL

**April 4–5**, The Seventh Annual Pharmacogenetics in Psychiatry Meeting, New York, NY. Contact: Patricia Raikos, The Zucker Hillside Hospital, 75-59 263rd Street, Glen Oaks, NY 11004; (718) 470-8418 (tel), (718) 343-1659 (fax), [praikos@nshs.edu](mailto:praikos@nshs.edu) (e-mail), [www.pharmacogeneticsinpsychiatry.com](http://www.pharmacogeneticsinpsychiatry.com) (web site).

**April 5–9**, 16th European Congress of Psychiatry, Nice, France. Contact: Congress Secretariat, Kenes International, 17 Rue du Cendrier, PO Box 1726, CH-1211 Geneva 1, Switzerland; (41) 22 908 0488 (tel), (41) 22 732 2850 (fax), [aep@kenes.com](mailto:aep@kenes.com) (e-mail).

**April 11–12**, Mind and Body in Autism, New York City, NY. Contact: Teachers College Columbia University; <http://www.tc.edu/ceoi/Autism> (web site).

---

## MAY

**May 1–4**, The 52nd Annual Meeting of the American Academy of Psychoanalysis and Dynamic Psychiatry, Washington, DC. Contact: Executive Office, American Academy of Psychoanalysis and Dynamic Psychiatry, P. O. Box 30, Bloomfield, CT 06002; (888) 691-8281 (tel), (860) 286-0787 (fax), [info@aapdp.org](mailto:info@aapdp.org) (e-mail) [www.aapdp.org](http://www.aapdp.org) (web site).

**May 3–4**, American Academy of Psychiatry and the Law Semiannual Meeting, Washington, D.C. Contact: One Regency Drive, PO Box 30, Bloomfield, CT 06002-0030; (800) 331-1389, (tel) (860) 286-0787 (fax), [execoff@aapl.org](mailto:execoff@aapl.org) (e-mail).

**May 3–8**, 161st Annual Meeting of the American Psychiatric Association, Washington, DC. Contact: Cathy Nash, APA Annual Meetings Dept., 1000 Wilson Blvd., Ste. 1825, Arlington, VA 22209; (703) 907-7822.

**May 11–14**, World Psychiatric Association Epidemiology & Public Health Section Meeting, Saskatoon, Saskatchewan. Contact: Karen E. Mosier, Saskatchewan Health Organization for Research and Evaluation (SHORE), Department of Psychiatry, Ellis Hall, Room 110; (306) 966-1840 (tel), (306) 966-8761 (fax), [karen.mosier@usask.ca](mailto:karen.mosier@usask.ca) (e-mail), <http://www.medicine.usask.ca/psychiatry/wpa2008/>.

**May 29–31**, International Congress of Dual Pathology 2008, Madrid. Contact: Technical Secretariat, Tilesa OPC, Londres, 17 - 28028, Madrid, Spain; (34) 91 361 12600 (tel), (34) 91 355 9208, [secretariat@cipd2008.com](mailto:secretariat@cipd2008.com) (e-mail), [www.cipd2008.com](http://www.cipd2008.com) (web site).

---

## JUNE

**June 18–22**, American Psychoanalytic Association 97th Annual Meeting, Atlanta, GA. Contact: Dottie Jeffries, Director of Public Affairs, (212) 752-0450 x29 (tel), [djeffries@apsa.org](mailto:djeffries@apsa.org) (e-mail).

**June 19–22**, Annual Meeting of the Society for the Study of Psychiatry and Culture, "The Cultural Formulation and Cultural/Gender Issues in DSM-V," San Francisco, CA. Contact: Jim Boehnlein, M.D., Oregon Health and Science University, (505) 494-6653 (tel), [sspcadmin@gmail.com](mailto:sspcadmin@gmail.com) (e-mail) or Francis Lu, M.D. [francis.lu@sfglh.org](mailto:francis.lu@sfglh.org) (e-mail)

**June 19–21**, Thematic Conference on Depression and Relevant Psychiatric Condition in Primary Care, Granada, Spain. Contact: Francisco Torres-González, Andalusian Research Group on Mental Health, University of Granada, Avenida de Madrid 11, Granada 18071, Spain; (34) 958-272651 (tel), (34) 958-275214 (fax), [ftorres@ugr.es](mailto:ftorres@ugr.es) (e-mail).

**June 21–25**, 1st Schizophrenia International Research Society Conference, Venice, Italy. Contact: Schizophrenia International Research Society,

[schizophreniasoc@aol.com](mailto:schizophreniasoc@aol.com) (e-mail), [www.schizophreniaconference.org](http://www.schizophreniaconference.org) (web site)

---

## OCTOBER

**October 2–5**, 60th Institute on Psychiatric Services, American Psychiatric Association, Chicago, IL. Contact: Jill Gruber, APA Annual Meetings Dept., 1000 Wilson Blvd., Ste. 1825, Arlington, VA 22209; (703) 907-7815.

**October 28–November 2**, 55th Annual Meeting of the American Academy of Child and Adolescent Psychiatry, Chicago. Contact: AACAP, 3615 Wisconsin Avenue, N.W., Washington, DC 20016-3007; (202) 966-7300 (tel), (202) 966-2891 (fax), [meetings@aacap.org](mailto:meetings@aacap.org) (e-mail), [www.aacap.org](http://www.aacap.org) (web site).

---

## NOVEMBER

**November 23–28**, Canadian Psychiatric Association 58th Annual Meeting, Vancouver, British Columbia, Canada. Contact: 260-441 MacLaren Street, Ottawa, ON K2P 2H3, Canada; (800) 267-1555 (tel), (613) 234-9857 (fax), [cpa@medical.org](mailto:cpa@medical.org) (e-mail).

---

## FEBRUARY 2009

**February 18–22**, Annual Meeting of the American Neuropsychiatric Association (ANPA), San Antonio, TX. Contact: ANPA office; (614) 447-2077 (tel), (614) 263-4366 (fax), [anpa@osu.edu](mailto:anpa@osu.edu) (e-mail), [www.anpaonline.org](http://www.anpaonline.org) (web site).

**February 25–March 1**, American College of Psychiatrists Annual Meeting, Tucson, AZ. Contact: 122 South Michigan Avenue, Suite 1360, Chicago, IL 60603; (312) 662-1020 (tel), (312) 662-1025 (fax), [angel@ACPsych.org](mailto:angel@ACPsych.org) (e-mail).

---

Continued on page A49

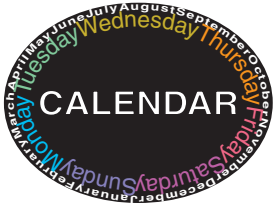

Continued from page A40

## MARCH

**March 5–8**, 22nd Annual Meeting of the American Association for Geriatric Psychiatry, Honolulu. Contact: AAGP, 7910 Woodmont Ave., Ste. 1050, Bethesda, MD 20814-3004; (301) 654-7850 (tel), (301) 654-4137 (fax), [www.aagpmeeting.org](http://www.aagpmeeting.org) (web site).

**March 27–29**, 3rd International Conference of The International Society of Interpersonal Psychotherapy (ISIPT), New York City, NY. Contact: 2009 ISIPT Planning Committee; [hv2009@columbia.edu](mailto:hv2009@columbia.edu) (e-mail).

## APRIL

**April 22–26**, Annual Meeting and Scientific Sessions of the Society of Behavioral Medicine, Montreal, Quebec. Contact: Society of Behavioral Medicine, (414) 918-3156 (tel), (414) 276-3349 (fax), [info@sbm.org](mailto:info@sbm.org) (e-mail).

## MAY

**May 16–21**, 162nd Annual Meeting of the American Psychiatric Association, San Francisco. Contact: Cathy Nash, APA Annual Meetings Dept., 1000 Wilson Blvd., Ste. 1825, Arlington, VA 22209; (703) 907-7822.

### FREE AUDIO! **Have You Heard?**

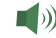

You can listen to highlights of *The American Journal of Psychiatry* by downloading a monthly free .mp3 audio file from our website (<http://ajp.psychiatryonline.org/misc/audio.dtl>) or by subscribing to the AJP Audio podcast at iTunes or other feed reader.

### Continuing Medical Education

Three articles in each issue provide an opportunity to earn up to 1 hour category 1 CME credit each by taking a course covering the content. Credit available online only with purchased subscription to AJP's CME program. Visit [cme.psychiatryonline.org](http://cme.psychiatryonline.org) for details.

## Coming in the May 2008 issue\*

### THE AMERICAN JOURNAL OF PSYCHIATRY

#### *The Cost-Effectiveness of Treatments For Adolescent Depression: Results From the TADS Randomized Trial*

M. Domino, B. Burns, S. Silva, C. Kratochvil, B. Vitiello, M. Reinecke, J. Mario, and J. March

#### *Stimulant Therapy and Risk For Subsequent Substance Use Disorders in Male Adults With ADHD: A Naturalistic, Controlled 10-Year Follow-Up Study*

J. Biederman, M. Monuteaux, T. Spencer, T. Wilens, H. MacPherson, and S. Faraone

#### *Age of Methylphenidate Treatment Initiation in Children With ADHD and Later Substance Abuse: Prospective Follow-Up Into Adulthood*

S. Mannuzza, R. Klein, N. Truong, J. Moulton, E. Roizen, K. Howell, and F. Castellanos

#### *Association of the Neurotrophic Tyrosine Kinase Receptor 3 (NTRK3) Gene and Childhood-Onset Mood Disorders*

Y. Feng, Á. Vetró, E. Kiss, K. Kapornai, G. Daróczy, L. Mayer, Z. Tamás, I. Baji, J. Gádoros, N. King, J. Kennedy, K. Wigg, M. Kovacs, and C. Barr

\*Can't wait? Visit [ajp.psychiatryonline.org](http://ajp.psychiatryonline.org) and click the "AJP in Advance" logo to see all articles uploaded in advance of print!
